# Supplementary material for: IL-36 receptor agonist and antagonist imbalance drives neutrophilic inflammation in COPD
Source: JCI journal article supplement (doi:10.1172/jci.insight.155581), 2022-06-28
Supplement: sd1 [file 1]

## Supplementary figures

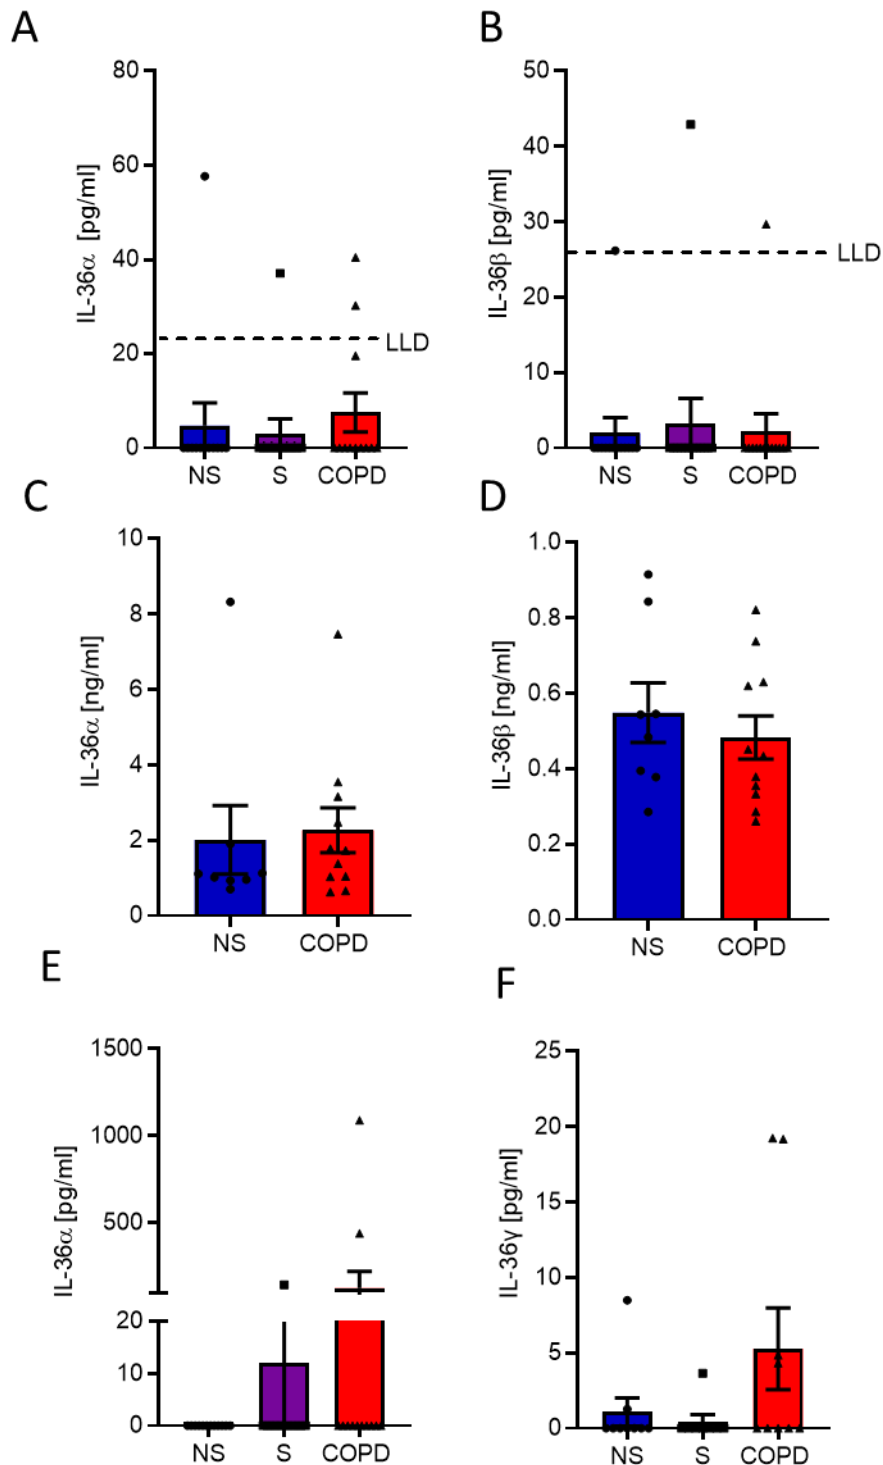

### Supplementary Figure 1. IL-36 cytokines levels in human samples.

A) IL-36 $\alpha$  and B) IL-36 $\beta$  were measured in bronchoalveolar lavage fluid of non-smokers (n=12), smokers (n=11) and COPD (n=11) patients by ELISA. C) IL-36 $\alpha$  and D) IL-36 $\beta$  were measured in nasal lining fluid of non-smoker (n=8) and COPD (n=11) patients by ELISA. E) IL-36 $\alpha$  and F) IL-36 $\gamma$  were measured in serum samples of non-smokers (n=11) smokers (n=12) and COPD (n=12) patients by ELISA. Data are mean  $\pm$  SEM and LLD = lower limit of detection

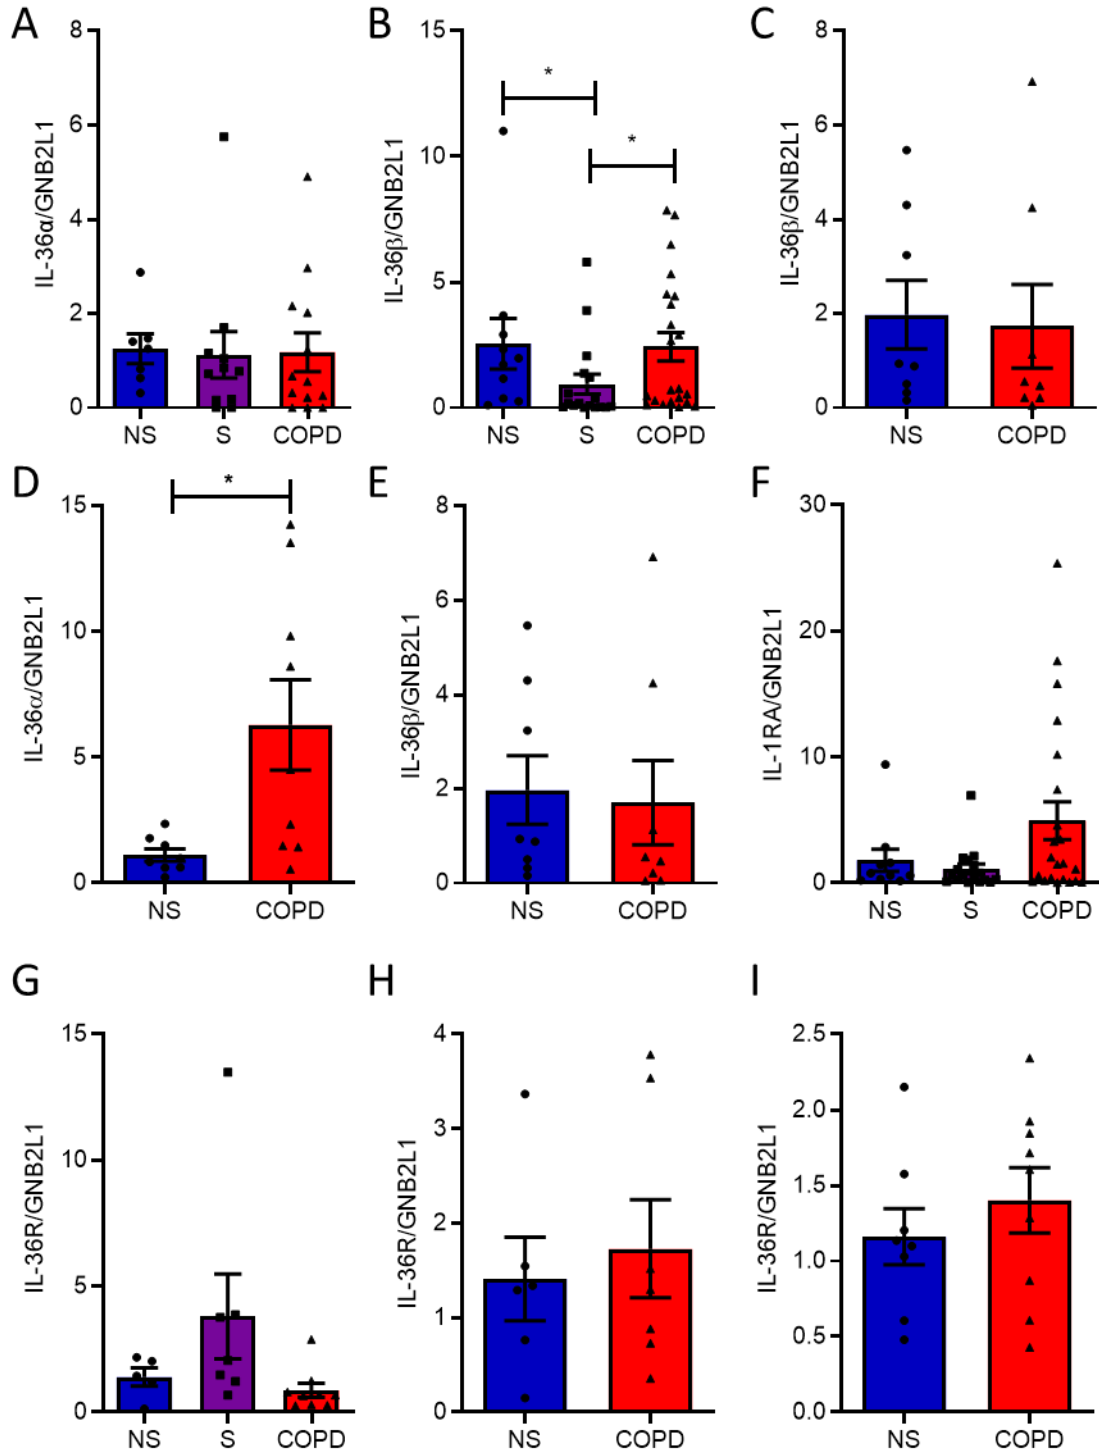

**Supplementary Figure 2. Expression of IL-36 isoforms and receptor in human lung tissue macrophages, small airway fibroblasts and small airway epithelial cells.** A) *IL-36A* and B) *IL-36B* gene expression were measured in lung tissue macrophages from non-smokers (NS) (n=7-11), smokers (S) (n=11-17) and COPD patients (n=13-22). C) *IL-36 $\beta$*  gene expression was measured in SAF from non-smokers (n=8) and COPD patients (n=8). Gene expression of D) *IL-36A* and E) *IL-36B* were measured in small airway epithelial cells from non-smokers (n=8) and COPD patients (n=9). F) *IL-1RA* gene expression was detected in non-smoker (n=10), smoker (n=17) and COPD (n=22) tissue macrophages. *IL-36* receptor gene expression was measured in G) tissue macrophages H) SAEC and I) SAF. Data are means  $\pm$  SEM and analyzed by Kruskal-Wallis test with post-hoc Dunn's test or by Mann-Whitney U test; \* P < 0.05.

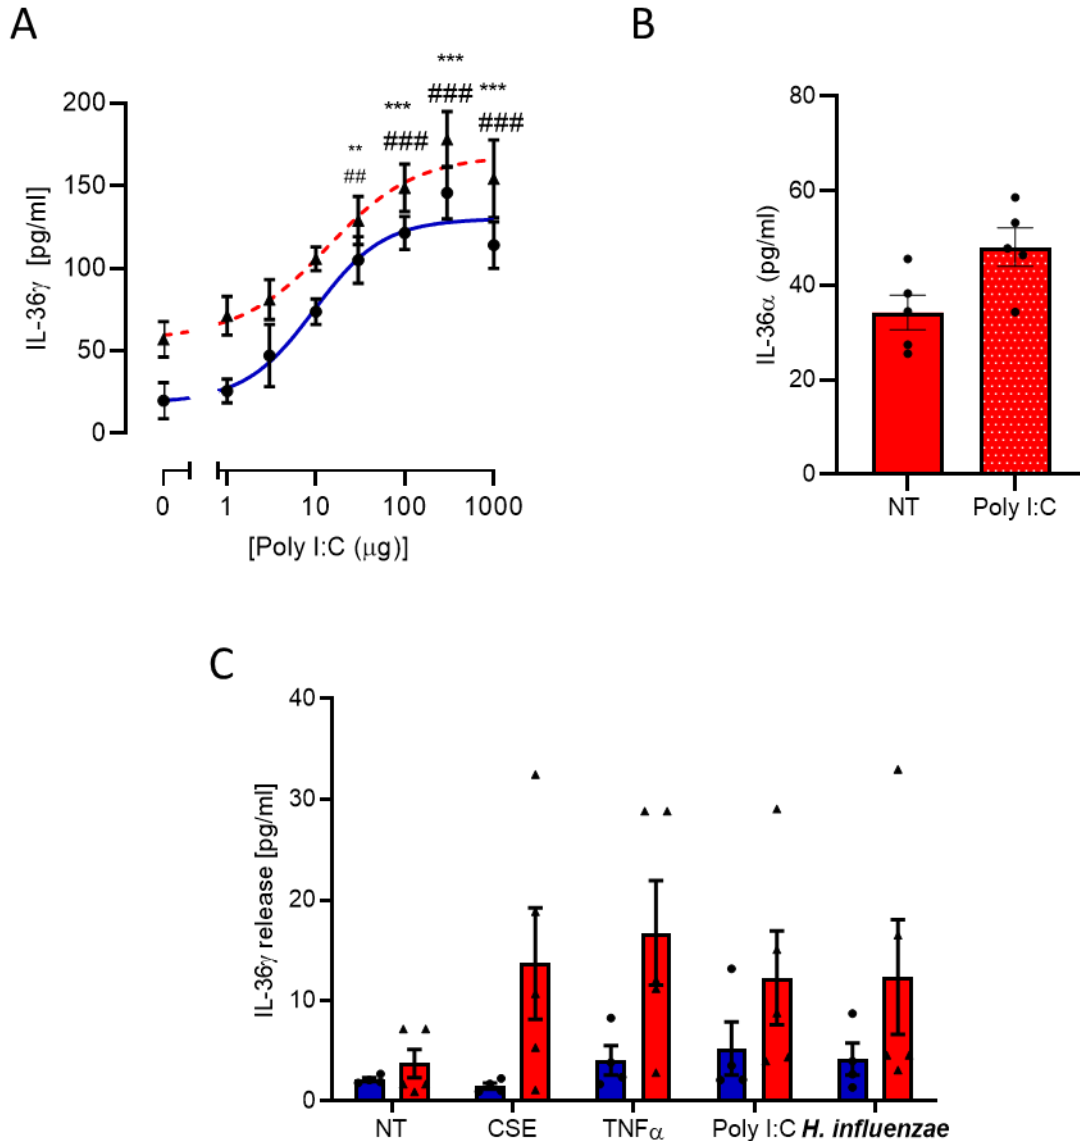

**Supplementary Figure 3. Poly I:C induces IL-36 $\gamma$  release from SAEC, but not SAF, whilst not inducing IL-36 $\alpha$ .** A) Small airway epithelial cells from non-smokers (NS, ●, blue n=3) and COPD patients (▲, red n=3) were exposed to increasing concentrations of poly I:C for 24h. Media was collected and IL-36 $\gamma$  was measured by ELISA. B) SAEC were treated with 100  $\mu$ g/ml of Poly I:C for 24 hours and IL-36 $\alpha$  release detected by ELISA. C) SAF from non-smokers (NS, ●, blue, n=4) and COPD patients (▲, red, n=5) were exposed to media alone (no treatment: NT), 10% (v/v) cigarette smoke extract (CSE), 10 ng/ml TNF $\alpha$ , 100 $\mu$ g/ml poly I:C, or 1.5x10<sup>10</sup> CFU/ml *H. influenzae* for 24h. Media was collected and IL-36 $\gamma$  release measured by ELISA. Data are means  $\pm$  SEM and analyzed by Kruskal-Wallis test with post-hoc Dunn's test \*\* P < 0.01 and \*\*\* P < 0.001 for COPD subjects and ### P < 0.01 and ### P < 0.001 for NS.

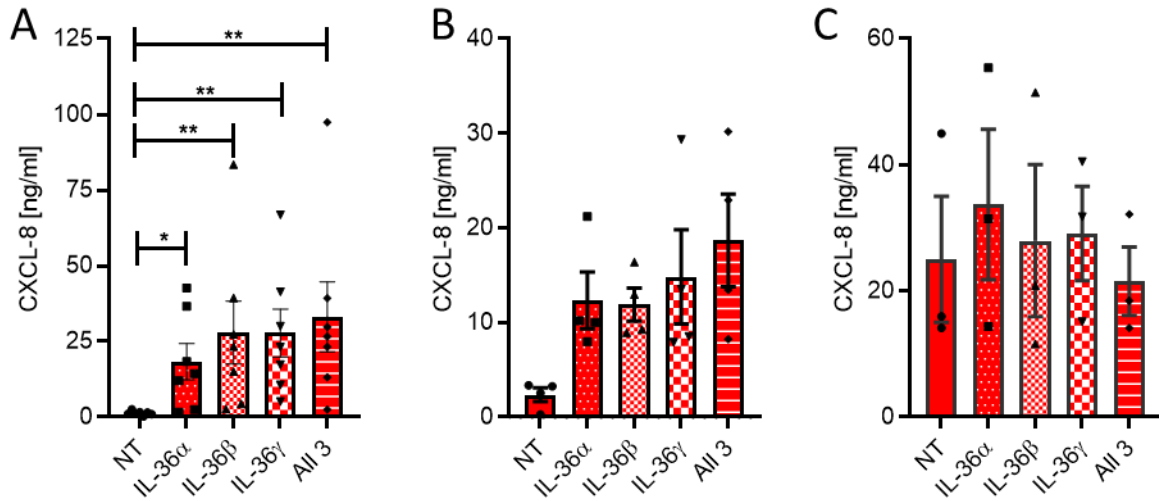

**Supplementary Figure 4. Effect of IL-36 cytokines alone and in combination on CXCL-8 release from small airway fibroblasts, human small airway epithelial cells and lung tissue macrophages.** A) Small airway fibroblasts, B) small airway epithelial cells and C) lung tissue macrophages were incubated in the absence (non-treated: NT) or presence of 33 ng/ml IL-36 $\alpha$ , IL-36 $\beta$ , IL-36 $\gamma$  or all three in combination for 24h. Media was harvested, and release of CXCL-8 measured by ELISA. Data are means  $\pm$  SEM and analyzed by Kruskal-Wallis test with post-hoc Dunn's test; \* P < 0.05, \*\* P < 0.01.

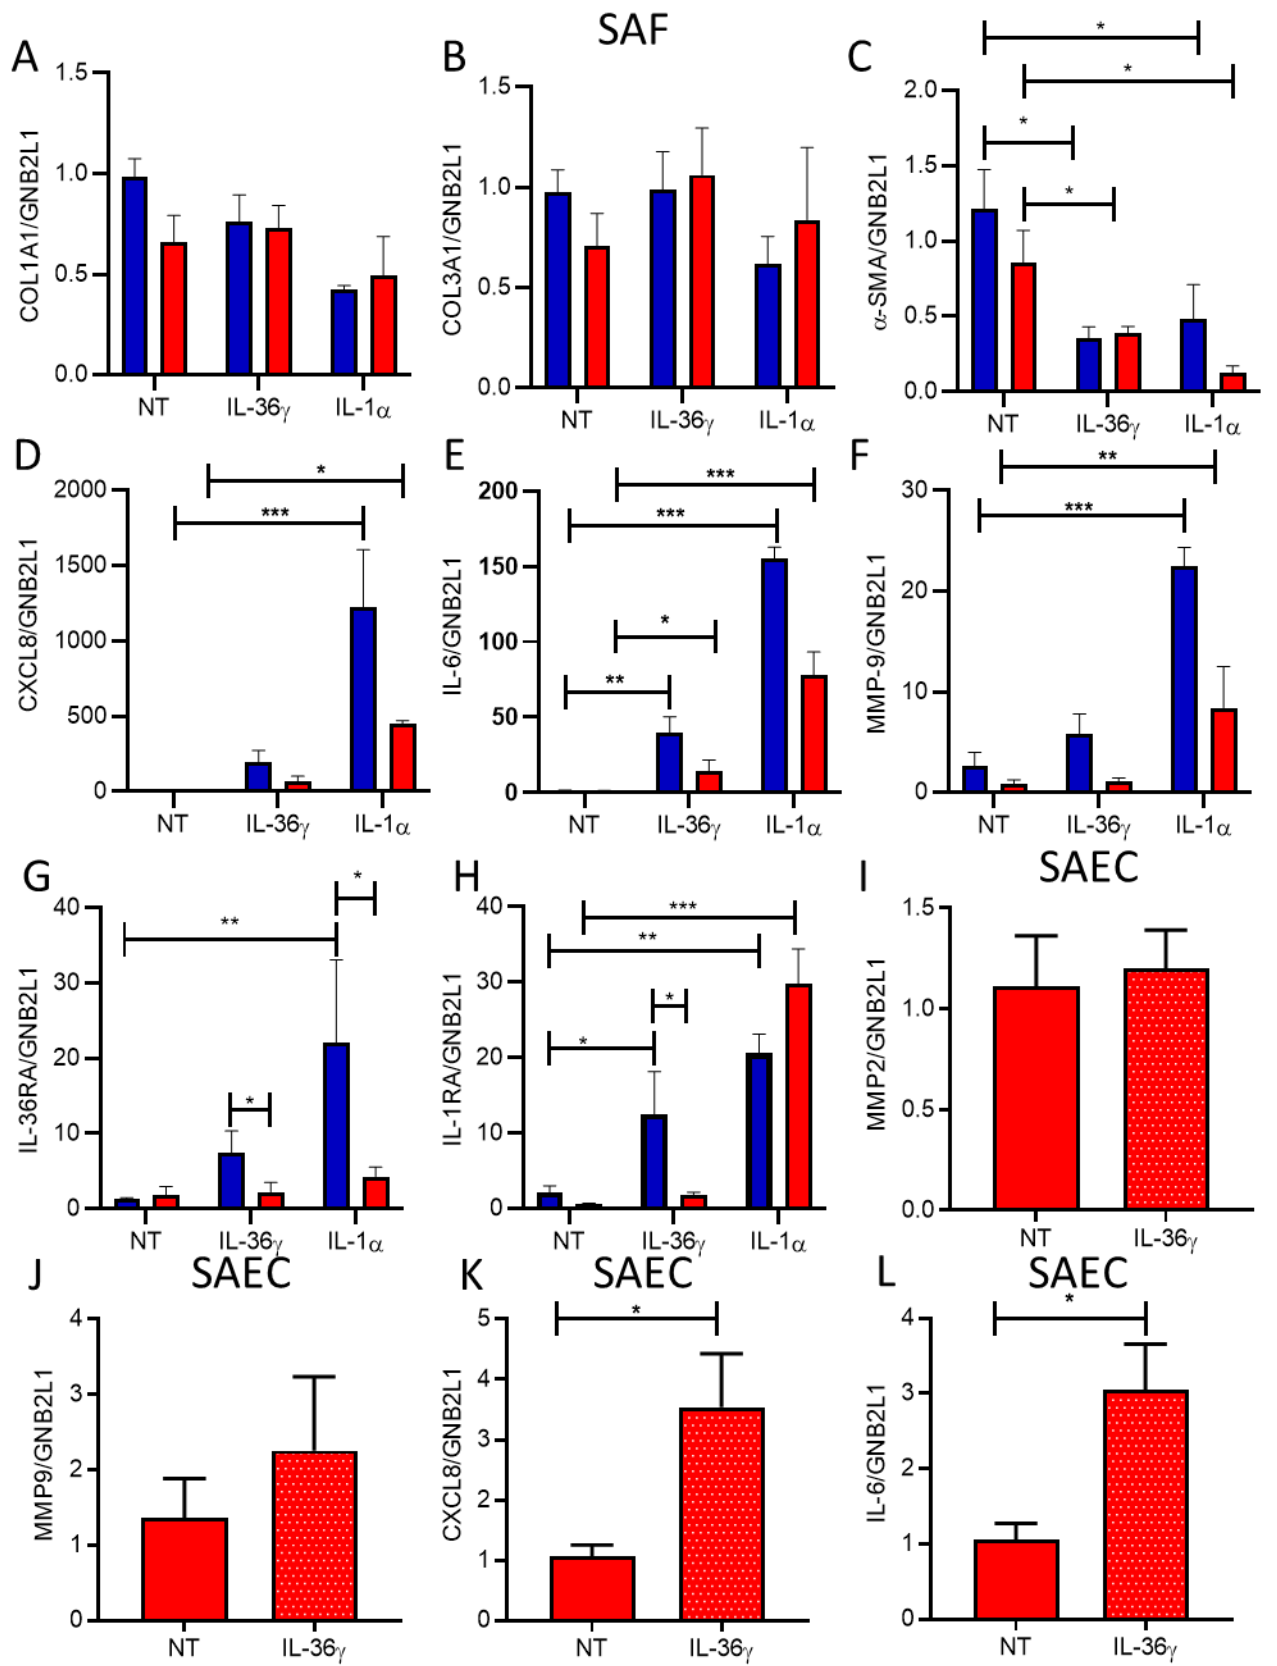

**Supplementary Figure 5. Effect of IL-36 $\gamma$  and IL-1 $\alpha$  cytokines on gene expression in small airway fibroblasts (SAF) and small airway epithelial cells (SAEC).** Small airway fibroblasts from non-smokers (n=7, blue) or COPD (n=7, red) were treated with 100 ng/ml of IL-36 $\gamma$  or IL-1 $\alpha$  ng/ml for 24h. RNA was collected and gene expression of A) COL1A1, B) COL3A1, C)  $\alpha$ -SMA and D) CXCL8, E) IL-6, F) MMP-9, G) IL-36RN and H) IL-1RA were detected by qRT-PCR. Small airway epithelial cells (n=4) were treated with 100 ng/ml of IL-36 $\gamma$  for 24h. RNA collected and gene expression of I) MMP-2, J) MMP-9, K) CXCL8, and L) IL-6, were detected by qRT-PCR Data are means  $\pm$  SEM and analyzed by two-way anova with post-hoc Dunnett's multiple comparisons test (panel A-H) or by Mann-Whitney U test (panel I-L) ; \* P <0.05, \*\* P<0.01, \*\*\* P<0.001.

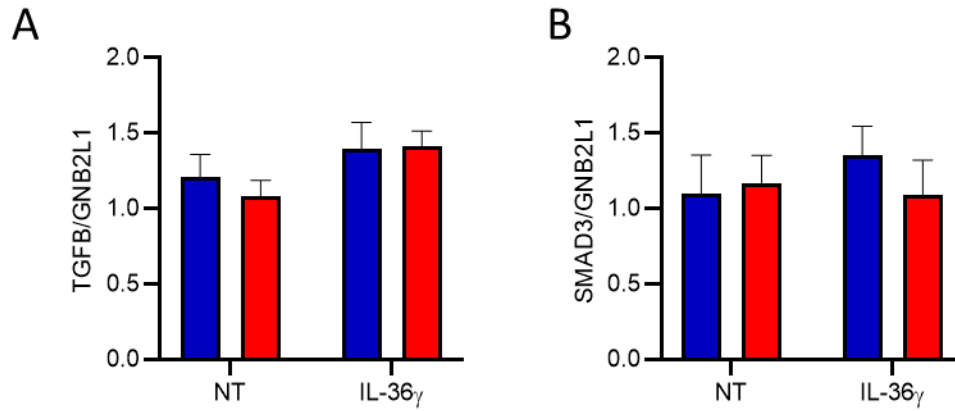

**Supplementary Figure 6. Effect of IL-36 $\gamma$  on gene expression in small airway fibroblasts (SAF).** Small airway fibroblasts from non-smokers (n=6, blue) or COPD (n=6, red) were treated with 100 ng/ml of IL-36 $\gamma$  for 24h. RNA was collected and gene expression of A) TGFB $\beta$ , and B) SMAD3 were detected by qRT-PCR. Data are means  $\pm$  SEM.



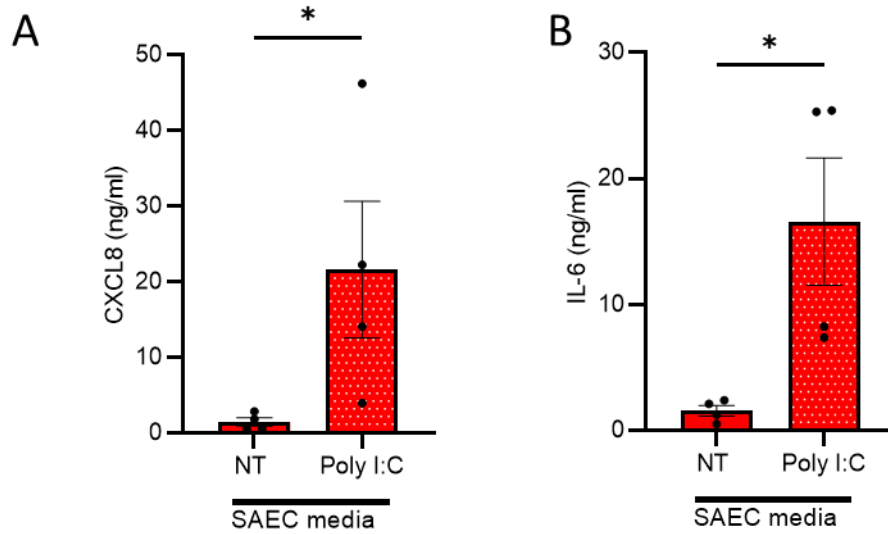

**Supplementary Figure 7. Poly I:C stimulated SAEC conditions media induces release of other cytokines from SAF.** Small airway fibroblast (n=4) were treated with diluted (ranging from 10-200 fold) media from untreated or Poly I:C treated SAEC and A) CXCL8 and B) IL-6 release were detected by ELISA. Data are means  $\pm$  SEM and analyzed by Mann-Whitney U test; \* P < 0.05.

**Supplementary Table 1. The characteristics of subjects for bronchoscopy**

|                                       | <b>Non-smoker</b> | <b>Smoker</b> | <b>COPD</b> |
|---------------------------------------|-------------------|---------------|-------------|
| Sex (F:M)                             | 2:8               | 3:7           | 5:5         |
| Age (years)                           | 62±10.6           | 56±6.2        | 64.5±13.2   |
| Smoking history (pack-years)          | 0                 | 27.8±10       | 37.8±14.6   |
| FEV <sub>1</sub> (L)                  | 3.2±0.5           | 2.9±0.7       | 1.6±0.5*    |
| FEV <sub>1</sub> (% predicted normal) | 100.2±10.0        | 86.6±15.9     | 62.9±22.7** |
| FVC (L)                               | 3.9±0.75          | 3.9±1.0       | 2.9±0.75    |
| FEV <sub>1</sub> /FVC                 | 0.79±0.1          | 0.75±0.1      | 0.52±0.1*** |

Abbreviations: COPD = chronic obstructive pulmonary disease; FEV<sub>1</sub> = forced expiratory volume in one second; FVC = forced vital capacity; Data are expressed as mean value ± standard deviation and by Kruskal-Wallis test with post-hoc Dunn's test; \* P <0.05, \*\*P<0.01 and \*\*\* P<0.001 compared to non-smokers.

**Supplementary Table 2. The characteristics of study subjects for sputum samples**

|                                             | <b>Non-smoker</b> | <b>Smoker</b> | <b>COPD</b>    |
|---------------------------------------------|-------------------|---------------|----------------|
| <b>Sex (F:M)</b>                            | 9:9               | 4:4           | 7:13           |
| <b>Age (years)</b>                          | 46.25±11.05       | 55.8±3.2      | 68.6±9.7**     |
| <b>Smoking history (Pack-years)</b>         | 0                 | 37±8.6***     | 44.7±31.6***   |
| <b>FEV<sub>1</sub> (L)</b>                  | 2.9±0.9           | 2.67±0.5      | 1.46±0.7***    |
| <b>FEV<sub>1</sub> (% predicted normal)</b> | 97.4±17.3         | 95.8±13.3     | 55.6.1±26.5*** |
| <b>FVC (L)</b>                              | 3.7±1.2           | 2.6±0.5       | 3.1±0.9        |
| <b>FEV<sub>1</sub>/FVC</b>                  | 0.78±0.7          | 0.77±0.1      | 0.46±0.2***    |

Abbreviations: COPD = chronic obstructive pulmonary disease; FEV<sub>1</sub> = forced expiratory volume in one second; FVC = forced vital capacity. Data are expressed as mean value ± standard deviation and by Kruskal-Wallis test with post-hoc Dunn's test; \*\*P<0.01 and \*\*\* P<0.001 compared to non-smokers.

**Supplementary Table 3. The characteristics of study subjects for nasal absorption samples**

|                                     | <b>Non-smoker</b> | <b>COPD</b>  |
|-------------------------------------|-------------------|--------------|
| <b>Sex ratio (F:M)</b>              | 6:2               | 8:12         |
| <b>Age (years)</b>                  | 61.1±3.2          | 66.5±2.1     |
| <b>Smoking History (pack years)</b> | 0.0±0.0           | 51.47±7.5*** |
| <b>FEV<sub>1</sub> (L)</b>          | 2.8±0.3           | 1.4±0.6**    |
| <b>FEV<sub>1</sub> % Predicted</b>  | 109.4±5.5         | 54.75±4.3*** |
| <b>FVC (L)</b>                      | 3.8±0.5           | 3.0±1.9      |
| <b>FEV<sub>1</sub>:FVC</b>          | 0.75±0.0          | 0.48±0.0***  |

Abbreviations: COPD = chronic obstructive pulmonary disease; FEV<sub>1</sub> = forced expiratory volume in one second; FVC = forced vital capacity. Data are expressed as mean value ± standard deviation and analyzed by Mann-Whitney U test; \* P < 0.05 \*\*\*P < 0.001 compared to non-smokers.

**Supplementary Table 4. The characteristics of study subjects for primary tissue macrophages**

|                                             | <b>Non-smoker</b> | <b>Smoker</b> | <b>COPD</b>   |
|---------------------------------------------|-------------------|---------------|---------------|
| <b>Sex (F:M)</b>                            | 7:3               | 10:14         | 13:16         |
| <b>Age (years)</b>                          | 69±7.7            | 66±12.2       | 69±8.9        |
| <b>Smoking history (Pack-years)</b>         | 0                 | 35.1±27.8***  | 38.6±18.1**   |
| <b>FEV<sub>1</sub> (L)</b>                  | 2.2±0.7           | 2.5±0.6       | 1.2±0.6*      |
| <b>FEV<sub>1</sub> (% predicted normal)</b> | 92.2±24.4         | 103.2±22.5    | 52.1.1±29.6** |
| <b>FVC (L)</b>                              | 2.6±0.8           | 3.5±0.8       | 2.7±1.1       |
| <b>FEV<sub>1</sub>/FVC</b>                  | 0.8±0.1           | 0.72±0.1      | 0.43±0.1***   |

Abbreviations: COPD = chronic obstructive pulmonary disease; FEV<sub>1</sub> = forced expiratory volume in one second; FVC = forced vital capacity. Data are expressed as mean value ± standard deviation and by Kruskal-Wallis test with post-hoc Dunn's test; \* P < 0.05, \*\*P < 0.01 and \*\*\* P < 0.001 compared to non-smokers.

**Supplementary Table 5. The characteristics of study subjects for primary airway epithelial cells**

|                                     | <b>Non-smoker</b> | <b>COPD</b> |
|-------------------------------------|-------------------|-------------|
| <b>Sex ratio (F:M)</b>              | 7:4               | 10:7        |
| <b>Age (years)</b>                  | 71.7±4.3          | 68.9±6.5    |
| <b>Smoking History (pack years)</b> | 0.0±0.0           | 41.3±13.2** |
| <b>FEV<sub>1</sub> (L)</b>          | 2.1±0.6           | 1.1±0.89*   |
| <b>FEV<sub>1</sub> % Predicted</b>  | 95.5±19.3         | 50.6±25.8** |
| <b>FVC (L)</b>                      | 2.8±0.7           | 2.5±0.8     |
| <b>FEV<sub>1</sub>:FVC</b>          | 0.74±0.1          | 0.5±0.2**   |

Abbreviations: COPD = chronic obstructive pulmonary disease; FEV<sub>1</sub> = forced expiratory volume in one second; FVC = forced vital capacity; Data are expressed as mean value ± standard deviation and analyzed by Mann-Whitney U test; \* P <0.05 \*\*P<0.01 compared to non-smokers.

**Supplementary Table 6. The characteristics of study subjects for primary small airway fibroblasts**

|                                     | <b>Non-smoker</b> | <b>COPD</b>  |
|-------------------------------------|-------------------|--------------|
| <b>Sex ratio (F:M)</b>              | 7:9               | 7:5          |
| <b>Age (years)</b>                  | 64.6±9.1          | 65.5±8.7     |
| <b>Smoking History (pack years)</b> | 0.0±0.0           | 34.5±18.3**  |
| <b>FEV<sub>1</sub> (L)</b>          | 2.7±0.9           | 1.5±0.8*     |
| <b>FEV<sub>1</sub> % Predicted</b>  | 92.7±11.6         | 52.9±25.6*** |
| <b>FVC (L)</b>                      | 3.4±0.8           | 3.2±1.1      |
| <b>FEV<sub>1</sub>:FVC</b>          | 0.79±0.1          | 0.54±0.2**   |

Abbreviations: COPD = chronic obstructive pulmonary disease; FEV<sub>1</sub> = forced expiratory volume in one second; FVC = forced vital capacity; Data are expressed as mean value ± standard deviation and analyzed by Mann-Whitney U test; \* P <0.05, \*\*P<0.01 and \*\*\* P<0.001 compared to non-smokers

**Supplementary Table 7. The characteristics of study subjects for lung homogenate samples**

|                                         | <b>Non-smokers<br/>(n=9)</b> | <b>Smokers<br/>(n=9)</b> | <b>GOLD Stage 1<br/>(n=9)</b> | <b>GOLD Stage 2<br/>(n=9)</b> | <b>GOLD Stage 3<br/>(n=3)</b> | <b>GOLD Stage 4<br/>(n=6)</b> |
|-----------------------------------------|------------------------------|--------------------------|-------------------------------|-------------------------------|-------------------------------|-------------------------------|
| <b>Age (years)</b>                      | 63.4±13.6                    | 63±12.3                  | 67.7±7.0                      | 63.0±9.3                      | 62.3±10.9                     | 59.8±4.5                      |
| <b>Sex (F:M)</b>                        | 7:2                          | 5:4                      | 3:5                           | 5:4                           | 1:2                           | 4:2                           |
| <b>FEV<sub>1</sub> (L)</b>              | 2.56±0.6                     | 2.8 ±0.6                 | 2.7±0.6                       | 1.8±0.4*                      | 1.69±0.4*                     | 0.5±0.18**                    |
| <b>FEV<sub>1</sub> (% predicted)</b>    | 97.2±16.4                    | 99.4±13.3                | 89.1±3.9                      | 65.4±17.5**                   | 49.7±4.3*                     | 16.1±2.9***                   |
| <b>FVC (L)</b>                          | 3.2±1.1                      | 3.6±0.9                  | 4.0±0.9                       | 3.1±0.8                       | 3.0.1±0.7                     | 1.75±0.5*                     |
| <b>FEV<sub>1</sub>:FVC</b>              | 80.3±4.9                     | 75.4±4.1                 | 64.3±3.6*                     | 61.5±7.9**                    | 51.8±7.1*                     | 28.5±8.1***                   |
| <b>Smoking History<br/>(Pack years)</b> | 0±0                          | 61.1±32.4                | 44.3±17.0                     | 57.7±35.4                     | 46.6±21.8                     | 38.6±15.9                     |

Abbreviations: COPD = chronic obstructive pulmonary disease; FEV<sub>1</sub> = forced expiratory volume in one second; FVC = forced vital capacity. Data are expressed as mean value ± standard deviation and by Kruskal-Wallis test with post-hoc Dunn's test; \* P <0.05, \*\*P<0.01 and \*\*\* P<0.001 compared to non-smokers.
